1 **Title: Sex- and context-dependent effects of acute isolation on vocal and non-vocal**  
2 **social behaviors in mice**

3 **Short title: Effects of acute isolation on social behavior depend on sex and context**

4 Xin Zhao<sup>¶</sup>, Patryk Ziobro<sup>¶</sup>, Nicole M. Pranic<sup>¶</sup>, Samantha Chu, Samantha Rabinovich, William  
5 Chan, Jennifer Zhao, Caroline Kornbrek, Zichen He, Katherine A. Tschida\*

6 Department of Psychology, Cornell University, Ithaca, NY 14853

7 <sup>¶</sup>Co-first authors

8 \*Corresponding Author: Katherine Tschida, [kat227@cornell.edu](mailto:kat227@cornell.edu)

9 **Abstract**

10 Humans are extraordinarily social, and social isolation has profound effects on our behavior,  
11 ranging from increased social motivation following short periods of social isolation to increased  
12 anti-social behaviors following long-term social isolation. Mice are frequently used as a model to  
13 understand how social isolation impacts the brain and behavior. While the effects of chronic  
14 social isolation on mouse social behavior have been well studied, much less is known about  
15 how acute isolation impacts mouse social behavior and whether these effects vary according to  
16 the sex of the mouse and the behavioral context of the social encounter. To address these  
17 questions, we characterized the effects of acute (3-day) social isolation on the vocal and non-  
18 vocal social behaviors of male and female mice during same-sex and opposite-sex social  
19 interactions. Our experiments uncovered pronounced effects of acute isolation on social  
20 interactions between female mice, while revealing more subtle effects on the social behaviors of  
21 male mice during same-sex and opposite-sex interactions. Our findings advance the study of  
22 same-sex interactions between female mice as an attractive paradigm to investigate neural  
23 mechanisms through which acute isolation enhances social motivation and promotes social  
24 behavior.

25 **Keywords:** vocalization, ultrasonic, social isolation, social context

## 26 **Introduction**

27 Social interactions form the backbone of our experiences as humans. We find social interactions  
28 intrinsically rewarding, and we are highly motivated to seek out social contact and to form and  
29 maintain social bonds. Consequently, the experience of social isolation is aversive and  
30 increases our motivation to seek out and engage in social interactions (1-3). Rodents are  
31 frequently used as a model to understand how social isolation impacts emotional states and  
32 engagement in social behaviors in humans. As in humans, chronic social isolation in rodents  
33 leads to increases in anti-social behaviors, including increased anxiety, increased aggression,  
34 and decreased social motivation (4-14). A number of studies have also reported effects (or lack  
35 thereof) of chronic social isolation on the production of ultrasonic vocalizations (USVs) (15-19),  
36 which many rodents emit during same-sex and opposite-sex social encounters (20, 21).  
37 However, much less is known about how rodent social behavior is affected by short-term social  
38 isolation. A small number of studies have reported that acute social isolation promotes  
39 subsequent social interaction in rodents (22-25), but it remains unknown whether the production  
40 of social USVs is similarly enhanced during social encounters following acute isolation.  
41 Furthermore, most studies to date have characterized the effects of isolation on social behavior  
42 in a single context, often focusing on social interactions between male rodents (15, 17, 22, 23).  
43 Thus, it remains unknown whether the effects of acute isolation on rodent social behavior are  
44 generalized across many types of social interactions, or alternatively, vary according to sex and  
45 social context.

46 To address these questions, we examined the effects of acute (3-day) social isolation on the  
47 vocal and non-vocal social behaviors of adult male and female B57BL/6J mice during  
48 subsequent same-sex and opposite-sex interactions. We found that acute isolation exerts both  
49 sex- and context-dependent effects on USV production and non-vocal social behaviors, with  
50 particularly strong effects on the vocal and non-vocal social behaviors of same-sex pairs of

51 females. Furthermore, we found differences in how USV production is related to non-vocal  
52 social behaviors in different social contexts, revealing sex- and context-dependent differences in  
53 the coupling between USV production and social motivation. This study provides the first direct  
54 comparison of the effects of acute isolation on mouse social behavior across sex and social  
55 context, and our findings indicate that same-sex interactions between female mice are an  
56 attractive paradigm to investigate the neural mechanisms through which acute isolation  
57 enhances social motivation and promotes social interaction.

58

## 59 **Results**

60 To measure the effects of acute social isolation on the vocal and non-vocal social behaviors of  
61 mice, we performed video and audio recordings during 30-minute social encounters between  
62 opposite-sex and same-sex pairs of mice (i.e., female-female, male-male, and male-female  
63 interactions). Recordings were performed in the home cage of the resident animal, which had  
64 been either group-housed continuously with its same-sex siblings or single-housed for three  
65 days prior to the day of the experiment. An unfamiliar group-housed visitor mouse was then  
66 introduced to the resident's home cage, and vocal and non-vocal social behaviors were  
67 recorded. In the case of male-female encounters, the resident mouse was always the male.  
68 During interactions between same-sex pairs of mice, previous studies have found that either  
69 mouse in the pair can produce ultrasonic vocalizations (USVs) (26, 27). For this reason, we  
70 made no assumptions about which mouse in a same-sex pair was vocalizing at a given time  
71 and report the total number of USVs produced by the pair. In the case of opposite-sex  
72 interactions, previous work has shown that males produce the majority (~85%) of USVs during  
73 interactions with females (28, 29), and we similarly assume that most USVs are produced by the  
74 resident male mouse. We examined the effects of acute social isolation on USV production,

75 non-vocal social behaviors, and the relationship between vocalizations and non-vocal social  
76 behaviors in these three social contexts.

### 77 **Effects of acute isolation on USV production in same-sex and opposite-sex interactions**

78 We first measured the effects of acute social isolation on the production of USVs during  
79 interactions between pairs of females. We observed robust effects of acute social isolation on  
80 the vocal behavior of females, and the total number of USVs produced in female-female  
81 interactions was nearly four times higher in pairs with a single-housed resident compared to  
82 pairs with a group-housed resident (Fig. 1A;  $1441 \pm 654$  USVs in  $N=22$  single-housed resident  
83 trials vs.  $369 \pm 357$  USVs in  $N = 31$  group-housed resident trials;  $p < 0.0001$ , Mann Whitney U  
84 test). USV production tended to peak during the first 5 minutes in both types of pairs, although  
85 female-female pairs with a single-housed resident emitted USVs with a shorter average latency  
86 (Fig. 1A, S1 Fig; mean latency = 13.1 s for single-housed resident trials vs. 89.0 s for group-  
87 housed resident trials,  $p = 0.03$ , Mann Whitney U test). We conclude that acute social isolation  
88 robustly enhances the production of USVs during social interactions between pairs of females.

89 In contrast to the strong effects of isolation on female-female vocal behavior, there was no  
90 significant effect of acute isolation on the total number of USVs emitted during male-male  
91 encounters or during male-female encounters (Fig. 1B-C;  $p = 0.15$  for  $N = 20$  group-housed  
92 resident vs.  $N = 21$  single-housed resident male-male trials;  $p = 0.44$  for  $N = 22$  group-housed  
93 resident vs.  $N = 16$  single-housed resident male-female trials, Mann Whitney U tests). Although  
94 acute isolation had no significant effect on the total number of USVs recorded during male-male  
95 and male-female interactions, we noted subtle effects of isolation on male vocal behavior. First,  
96 out of the 20 male-male trials with group-housed residents, USVs were detected in 8 trials.  
97 However, we noted that 3 of these 8 trials had only very low rates of USV production (1-3 USVs  
98 detected over the 30-minute trial). If we considered only male-male trials in which moderate  
99 rates of USVs were recorded ( $>25$  USVs), we found that a significantly greater proportion of

100 male-male trials with a single-housed resident had high USV production (14 of 21 trials with a  
101 single-housed resident vs. 5 of 20 trials with a group-housed resident;  $p = 0.02$ , z-test for two  
102 independent proportions). Second, we noted that single-housed male residents emitted USVs  
103 earlier in the trial than group-housed male residents when interacting with females (Fig. 1C, S1  
104 Fig; mean latency = 35.3 s for single-housed resident trials vs. 182.9 s for group-housed  
105 resident trials;  $p = 0.03$ , Mann Whitney U test;  $p = 0.61$  for difference in USV latency in male-  
106 male trials). In summary, acute social isolation enhances USV production between pairs of  
107 female mice and exerts more subtle effects on USV production by males during same-sex and  
108 opposite-sex interactions.

### 109 **Effects of acute isolation on non-vocal social behaviors in same-sex and opposite-sex** 110 **interactions**

111 Acute isolation exerts sex- and context-dependent effects on USV production, and we wondered  
112 whether isolation also impacted non-vocal social behaviors differentially in these groups of mice.  
113 To examine the effects of isolation on the overall amount of social interaction, we considered  
114 non-vocal social behavior as the sum of all types of social interactions observed in a trial (i.e.,  
115 sniffing, following, chasing, mounting, and fighting). We found that pairs of females with a  
116 single-housed resident spent significantly more time engaged in social interaction than pairs  
117 with a group-housed resident (Fig. 2A; pairs with single-housed resident spent  $21.8 \pm 10.5\%$  of  
118 trial time interacting vs.  $7.3 \pm 4.1\%$  in pairs with group-housed residents;  $p < 0.001$ , Mann  
119 Whitney U test). In male-male interactions, acute social isolation of the resident mouse tended  
120 to increase the time that males spent interacting, although this effect was not significant (Fig.  
121 2A; pairs with single-housed resident spent  $14.5 \pm 9.2\%$  of trial time interacting vs.  $9.2 \pm 4.9\%$  in  
122 pairs with group-housed residents  $p = 0.08$ , Mann Whitney U test). Similarly, in male-female  
123 interactions, acute social isolation of the resident male tended to increase the time the pair  
124 spent interacting, but these effects were not significant (Fig. 2A; pairs with single-housed

125 resident spent  $19.6 \pm 11.8\%$  of trial time interacting vs.  $13.6 \pm 9.3\%$  in pairs with group-housed  
126 residents  $p = 0.08$ , Mann Whitney U test). In summary, acute social isolation tends to increase  
127 the amount of time spent interacting in both same-sex and opposite-sex pairs, although it does  
128 so most robustly (and at the level of statistical significance) for female-female pairs.

129 We next considered the effects of acute social isolation on specific types of non-vocal social  
130 behaviors, by categorizing periods of social interaction as resident-initiated social interaction  
131 (i.e., sniffing, following, chasing), visitor-initiated social interaction, and mutual social interaction  
132 (i.e., mutual sniffing). Although mounting and fighting were observed in a subset of trials, these  
133 behaviors occupied a small percentage of the total trial time (typically  $<5\%$ ) and are considered  
134 separately below. In female-female trials, we found that single-housed residents spent  
135 significantly more time initiating social interactions than group-housed residents (sniffing,  
136 following, and chasing), and there were no significant differences in visitor-initiated social  
137 interaction or mutual interaction (Fig. 2B, left; two-way ANOVA with repeated measures on one-  
138 factor followed by post-hoc tests;  $p < 0.001$  for difference in resident-initiated interaction).  
139 Similarly, in male-male trials, single-housed residents spent significantly more time initiating  
140 social interaction than group-housed residents (Fig. 2B, middle;  $p = 0.003$  for difference in  
141 resident-initiated interaction). Finally, in male-female trials, there were no significant differences  
142 in the proportion of time spent in resident-initiated, visitor-initiated, or mutual social interaction ( $p$   
143  $> 0.05$ ). Thus, acute social isolation exerts sex- and context-dependent effects on social  
144 interaction, increasing resident-initiated social interaction in same-sex pairs of males and  
145 females but not in opposite-sex pairs of mice.

146 We next measured the effects of acute isolation on mounting behavior. Male mice commonly  
147 mount females during opposite-sex interactions, and mounting has also been reported to a  
148 lesser extent during same-sex interactions between males and females (30-33). Surprisingly,  
149 we observed a robust effect of acute isolation on mounting in female-female pairs. We never

150 observed mounting in female-female pairs with group-housed residents (Fig. 2C, 0/31 trials). In  
151 contrast, mounting was recorded in 11 of 22 trials with single-housed residents (Fig. 2C,  $p <$   
152  $0.0001$  for difference between groups, z-test for two independent proportions). Within these 11  
153 trials, we observed mounting events initiated by residents and by visitors (N = 6 trials with  
154 resident-initiated mounting, N = 4 trials with visitor-initiated mounting, and N = 1 trials with  
155 mounting initiated by both resident and visitor). In male-male trials, mounting was observed  
156 infrequently, and there was no apparent effect of acute social isolation on mounting (Fig. 2C,  
157 observed in 3 of 20 trials with group-housed residents and in 1 of 21 trials with single-housed  
158 residents,  $p > 0.05$ ). Finally, we found that acute social isolation increased mounting behavior of  
159 males during interactions with females (mounting in 3 of 22 male-female trials with group-  
160 housed residents vs. 9 of 16 trials with single-housed residents,  $p = 0.005$ ). In summary, acute  
161 social isolation promotes mounting between same-sex pairs of females and in opposite-sex  
162 pairs of mice.

163 Finally, we examined the effects of acute isolation on fighting, given that chronic social isolation  
164 is known to increase aggression in male rodents (4, 7, 10, 11, 13, 14). We never observed  
165 fighting in female-female and male-female trials (0/53 female-female trials, 0/38 male-female  
166 trials). In male-male trials, fighting was observed only infrequently, and there was no apparent  
167 effect of acute social isolation (fighting observed in 2 of 20 trials with group-housed residents  
168 and in 4 of 21 trials with single-housed residents,  $p = 0.41$ , z-test for two independent  
169 proportions). We conclude that acute social isolation does not significantly affect levels of  
170 aggression in males and female B57BL/6J mice.

## 171 **Effects of acute isolation on the relationship of USV production to non-vocal social** 172 **behaviors**

173 We next characterized the relationship between USV production and non-vocal social behaviors  
174 during same-sex and opposite-sex interactions and asked whether acute isolation affects the



175 relationship between vocalization and other social behaviors. In short, what are mice doing  
176 when they vocalize, and is that relationship affected by acute isolation? We examined the  
177 relationship between USV production and non-vocal social behaviors in general by comparing  
178 the total number of USVs produced to the total time spent interacting in the three different social  
179 contexts (Fig. 3A). In female-female pairs with a group-housed resident, we observed a  
180 significant positive relationship between the number of USVs produced and the proportion of  
181 time in the trial the mice spent interacting (Fig. 3A, left, black symbols,  $p = 0.002$  for linear  
182 regression,  $R^2 = 0.28$ ). Female pairs with a single-housed resident spent more time interacting  
183 and produced USVs, but we again observed a significant positive relationship between USV  
184 production and time spent interacting (Fig. 3A, left, red symbols,  $p = 0.001$  for linear regression,  
185  $R^2 = 0.42$ ). In summary, USV production is correlated with social interaction time in female pairs,  
186 and acute isolation potentiates social interaction during female-female encounters and drives a  
187 concomitant increase in USV production.

188 In contrast to our observations in female-female pairs, USV production was not well related to  
189 the total time spent interacting in male-male pairs with a group-housed resident (Fig. 3A, middle,  
190 black symbols,  $p=0.83$  for linear regression). Notably, this relationship was altered by acute  
191 isolation, and in male-male pairs with a single-housed resident, USV production was positively  
192 related to total time spent interacting (Fig. 3A, middle, red symbols,  $p = 0.02$ ,  $R^2 = 0.39$ ). Finally,  
193 USV production in male-female interactions was significant correlated with the total time the  
194 mice spent interacting, and this was true for trials with group-housed residents as well as trials  
195 with single-housed residents ( $p = 0.003$ ,  $R^2 = 0.36$  for linear regression in group-housed resident  
196 trials,  $p = 0.005$ ,  $R^2 = 0.43$  for single-housed resident trials). We conclude that acute isolation  
197 drives the emergence of coupling between USV production and non-vocal social behaviors in  
198 male-male interactions and has no effect on the relationship between USV production and total  
199 social interaction time in male-female interactions.

200 What proportion of USVs are produced during different non-vocal social behaviors in same-sex  
201 and opposite-sex interactions, and does acute isolation impact these relationships? To visualize  
202 the relationship between vocal and non-vocal behaviors in each trial, we created ethograms in  
203 which USV rates are plotted over time against the production of different categories of non-vocal  
204 social behavior for each trial in our dataset (Figs. S2-S7). We then calculated the proportion of  
205 the total USVs in each trial produced during different types of non-vocal social behavior in each  
206 of the 6 groups of mice (trials with <25 USVs were excluded from this analysis). We first  
207 considered the relationship of USV production to resident-initiated, visitor-initiated, and mutual  
208 social interactions, and we separately consider the relationship of USV production to mounting  
209 and fighting below.

210 Female-female pairs with a single-housed resident produced more USVs during resident-  
211 initiated social interactions than pairs with a group-housed resident, and there were no  
212 significant differences in the proportion of total USVs produced during visitor-initiated and  
213 mutual interactions (Fig. 3B, two-way ANOVA with repeated measures on one-factor, followed  
214 by post-hoc tests;  $p=0.03$  for difference in proportion of USVs produced during resident-initiated  
215 social interactions). We noted previously that resident-initiated interactions were significantly  
216 increased in female-female pairs with a single-housed resident, consistent with the idea that  
217 acute isolation increases USV production concomitantly with the increase in resident-initiated  
218 interactions (compare Fig. 3B left to Fig. 2B left). Similarly, male-male pairs with a single-  
219 housed resident produced a significantly higher proportion of total USVs during resident-initiated  
220 social interactions, in line with the observed increase in resident-initiated social interactions in  
221 male-male pairs with a single-housed resident (compare Fig. 3B middle to Fig. 2B middle).  
222 Finally, there were no significant differences in the proportion of total USVs produced during  
223 these three types of social behavior in male-female interactions with a group-housed vs. single-  
224 housed resident (Fig. 3B, right).

225 We then examined the relationship of USV production to mounting in the six groups of animals.  
226 As expected from previous work (34, 35), we found that mounting by males during opposite-sex  
227 social interactions was accompanied by USV production (Fig. 3C, right). Surprisingly, we found  
228 that all mounting events during same-sex female interactions were accompanied by USV  
229 production as well (Fig. 3C, mounting was accompanied by USV production in 11 of 11 trials  
230 with mounting). Finally, during male-male interactions, mounting was accompanied by USV  
231 production in 2 of the 4 total cases (Fig. 2C). In the two trials in which male-male mounting  
232 events were not accompanied by USV production, we note that mounting events immediately  
233 preceded fights (no fights were observed in the male-male trials in which mounting was  
234 accompanied by USV production). Because we only observed a small number of fights in our  
235 male-male trials, we cannot make any conclusions regarding the relationship between USV  
236 production and subsequent fighting. We note, however, that USV production never occurred  
237 during fights (Figs. S2-S7). In summary, acute isolation promoted mounting during female-  
238 female and male-female social interactions, and these mounting events were accompanied by  
239 USV production.

240

## 241 **Discussion**

242 In this study, we measured the effects of acute social isolation on vocal and non-vocal social  
243 behaviors of mice during same-sex and opposite-sex interactions. Acute social isolation had a  
244 profound effect on social interactions between pairs of females. Female pairs with a single-  
245 housed resident produced more USVs and spent more time interacting. In particular, single-  
246 housed female residents spent more time initiating social interactions with visitors, and we also  
247 observed the emergence of mounting accompanied by USV production in female pairs with  
248 single-housed residents, which was never observed in trials with group-housed residents. In  
249 contrast to these robust effects on same-sex interactions in females, acute isolation had more

250 subtle effects on social interactions between males. Although acute isolation did not significantly  
251 affect the total number of USVs produced during male-male interactions, a greater proportion of  
252 male pairs with a single-housed resident produced high rates of USVs (>25 USVs). Single-  
253 housed resident males spent more time initiating social interactions with visitors than group-  
254 housed residents, and acute isolation increased the coupling between USV production and non-  
255 vocal social interactions in male-male pairs. Finally, in male-female pairs, there were no effects  
256 of acute isolation of the resident male on the total number of USVs produced or the time spent  
257 interacting, although single-housed resident males were more likely to mount females than  
258 group-housed residents. We conclude that the effects of acute isolation on vocal and non-vocal  
259 social behavior vary according to sex and to social context, with the greatest impacts observed  
260 on interactions between pairs of females.

261 Why does acute isolation more robustly affect social interactions between females than  
262 interactions between males or opposite-sex pairs of mice? One idea is that interactions between  
263 pairs of females are affiliative and thus are strongly influenced by levels of pro-social motivation.  
264 Indeed, affiliative interactions between female mice are common, with demes of wild house  
265 mice frequently including several breeding and several non-breeding females (36, 37). In  
266 addition, female mice sometimes engage in communal nesting and nursing (38). In further  
267 support of this idea, social interactions between female mice are associated with neuronal  
268 activation within mesolimbic reward circuits, and artificial activation of dopaminergic inputs to  
269 the nucleus accumbens promotes social interaction between females (39). Acute social isolation  
270 may enhance pro-social motivation in females and thereby increase the production of vocal and  
271 non-vocal social behaviors in subsequent interactions between pairs of females. In contrast,  
272 interactions between males and females are dominated by male-initiated behaviors and likely  
273 reflect levels of sexual motivation rather than a more generic form of affiliative social motivation.  
274 Although we found that acute isolation increased male mounting during interactions with

275 females, the lack of effects on other aspects of vocal and non-vocal behavior during male-  
276 female encounters suggests that acute isolation does not strongly impact male sexual  
277 motivation. Finally, interactions between unfamiliar pairs of male mice are likely more agonistic  
278 than affiliative and thus are not as strongly impacted by acute social isolation as interactions  
279 between pairs of females. Although we observed low rates of fighting during the 30 minute-long  
280 male-male encounters used in our study, unfamiliar male mice engage in agonistic behaviors  
281 including chasing, mounting, and fighting to establish social hierarchies when housed together  
282 for longer periods of time (32, 40). In summary, one possibility is that acute social isolation  
283 strongly promotes affiliative social motivation and thereby strongly influences female-female  
284 social encounters, while exerting less pronounced effects on sexual and aggressive motivation  
285 during the social interactions of male mice.

286 We note, however, that the interpretation that isolation-induced increases in female social  
287 interaction are affiliative is somewhat complicated by our finding that acute isolation increases  
288 the occurrence of mounting during female-female interactions. Same-sex mounting in female  
289 mice has been described (31), and although its behavioral functions remain unclear, there is  
290 evidence that females use mounting to establish social dominance over other females (33). Of  
291 particular interest is our finding that female-female mounting is accompanied by USV  
292 production. Same-sex mounting between pairs of male mice is considered to be a low-level  
293 aggressive behavior (32), is controlled by a hypothalamic brain region important for aggression  
294 (30), and is typically not accompanied by USV production (30). This contrasts with male  
295 mounting of female mice, which is controlled by a hypothalamic brain region important for male  
296 sexual behavior (30, 41-44) and is typically accompanied by USV production (Fig. 3C) (30, 34,  
297 35). At present, the neural circuits that regulate female-female mounting remain unknown, and  
298 the elucidation of these circuits in future studies may shed light on the function of same-sex  
299 mounting between pairs of female mice, as well as on whether the isolation-induced increases

300 in female social interaction observed in the current study reflect an increase in affiliative or  
301 aggressive motivation.

302 What neural mechanisms underlie the potentiating effects of acute isolation on social  
303 interactions between pairs of females? Previous work has shown that chronic social isolation  
304 can exert sex-specific effects on female neural circuits and particularly on neuroendocrine  
305 signaling. Social isolation from the time of weaning alters the intrinsic properties of neurons in  
306 the paraventricular nucleus of the hypothalamus (PVN) that express corticotrophin-releasing  
307 hormone in female but not male mice (45). In prairie voles, a 4-week social isolation elevates  
308 the density of oxytocin-expressing neurons in the PVN and elevates plasma levels of oxytocin in  
309 females but not in males (46). In addition, although it remains unclear whether the isolation-  
310 induced increases in female interaction that we observed are affiliative or aggressive in nature,  
311 we note that female aggression is regulated by estradiol (47) and that social hierarchy position  
312 in female mice is associated with changes in estrogen receptor expression within the  
313 ventromedial hypothalamus (33). Future studies can examine whether changes in  
314 neuroendocrine and/or hormonal signaling contribute to the increase in female-female social  
315 interactions following acute isolation, with a particular emphasis on changes in signaling within  
316 neural circuits important to the production of USVs (48-50).

317 Chronic social isolation in rodents leads to increases in anti-social behaviors, including  
318 increasing aggressive behavior (4, 7, 10, 11, 13, 14), and studies performed with NIH Swiss and  
319 Swiss-Webster male mice also reported that acute social isolation increases aggressive  
320 behavior (51, 52). In contrast, work in male rats found that social isolation for up to 7 days does  
321 not increase aggressive behavior (23). In the current study, we observed fights between male  
322 mice only infrequently, and we didn't find any effects of acute social isolation on the occurrence  
323 of fighting between pairs of males. Taken together, these findings support the idea that there

324 may be both species and strain differences in the duration of social isolation that is required  
325 before the emergence of increased aggression and other anti-social behaviors is observed.

326 While characterizing the effects of acute isolation on social behavior, we discovered that the  
327 relationship of USV production to non-vocal social behaviors differs according to social context.  
328 During female-female and male-female encounters, USV production is well related to the  
329 amount of time spent the pairs of mice spent interacting, and this was true in pairs with group-  
330 housed residents as well as pairs with single-housed residents. We propose that in these social  
331 contexts, USV production can be used as a proxy for social and sexual motivation, respectively.  
332 In contrast, USV production wasn't well-coupled to the total time spent interacting in male-male  
333 trials with group-housed residents and we observed low rates of USV production in these trials,  
334 indicating that these pairs interacted without producing USVs. Interestingly, this relationship  
335 changes following acute isolation, and USV production scales with the total time spent  
336 interacting in male-male trials with single-housed residents. A prior study using chronic social  
337 isolation also found that USV production was positively related to the total amount of time spent  
338 interacting in pairs of males with a single-housed resident but not in pairs with a group-housed  
339 resident (15). The effect of acute isolation on the relationship between USV production and  
340 male-male social interaction is intriguing, and additional work is required to elucidate the  
341 significance of this change, and more broadly, the role of USV production during male-male  
342 social interactions.

343 One limitation of our approach is that we don't know which mouse is producing USVs during  
344 same-sex encounters. Indeed, the difficulty in ascertaining which mouse in a same-sex pair is  
345 vocalizing at a given moment has been a major roadblock to studying the behavioral functions  
346 of USV production during same-sex encounters. Recent studies employing microphone array  
347 recordings found that male mice produce most of the USVs in opposite-sex encounters (28, 29)  
348 and that both mice in a pair vocalize during male and female same-sex interactions, at least

349 when these interactions occur in a novel environment between previously single-housed  
350 animals (26, 27). However, microphone array recordings are challenging to implement in  
351 acoustically noisy home cage recordings, and the location of a behavioral encounter (home  
352 cage vs. novel chamber) can strongly impact the dynamics of a social interaction (53-55). For  
353 these reasons, we didn't implement microphone array recordings in the current study. Given  
354 that acute isolation increased female resident-initiated social interactions without affecting  
355 visitor-initiated social interactions, an attractive possibility is that an increase in USV production  
356 by the resident female following acute isolation drives the observed increase in USV rates in  
357 female-female pairs. Consistent with this idea, a previous studies showed that resident female  
358 mice will vocalize to an anesthetized female visitor but not vice versa (56). In future studies, we  
359 plan to implement real-time measurements and manipulations of activity in midbrain neurons  
360 important to USV production (48) to determine which mouse is vocalizing during same-sex  
361 interactions, and also to measure how manipulations of USV production affect social behavior  
362 during same-sex encounters.

363

## 364 **Materials and Methods**

365 Further information and requests for resources and reagents should be directed to the  
366 corresponding author, Katherine Tschida ([kat227@cornell.edu](mailto:kat227@cornell.edu)).

367 **Ethics Statement:** All experiments and procedures were conducted according to protocols  
368 approved by the Cornell University Institutional Animal Care and Use Committee (protocol  
369 #2020-001).

370 **Subjects:** Males and female C57BL/6J mice (Jackson Laboratories, 000664) were housed with  
371 their same-sex siblings following weaning until the beginning of the experiment (<7 weeks of



372 age). Mice were kept on a 14:10 reverse day-night cycle and given unlimited access to water  
373 and chow. The estrous state of female mice was not monitored.

374 **Behavioral Experiments:** Three days prior to the day of behavioral measurements, male and  
375 female subject mice either continued residing with their same-sex siblings (group-housed  
376 residents) or were single-housed until the day of recording (single-housed residents). On the  
377 day of the behavior measurements, the subject mouse was transferred in its home cage to a  
378 recording chamber (Med Associates) equipped with an ultrasonic microphone (Avisoft), infrared  
379 light source (Tendelux), and webcam (Logitech, with infrared filter removed to enable video  
380 recording under infrared lighting). The home cage was either placed inside a custom acrylic  
381 chamber (similar dimensions to the home cage but taller) or was fitted with a custom lid to  
382 permit USV recordings. In the case of group-housed residents, the mouse's siblings were  
383 removed from the home cage and transferred to a clean cage for the duration of the test. A  
384 novel group-housed visitor mouse (male or female depending on the context) was then placed  
385 in the subject animal's home cage for 30 minutes, and video and audio recordings were made.  
386 Visitor mice were used across multiple experiments, including those with single-housed  
387 residents and those with group-housed residents, and were therefore socially experienced.  
388 Many of our subject animals were socially naïve at the time of the experiment (i.e., no social  
389 experience other than with their same-sex siblings), and a subset of the subject animals (21/53  
390 female residents in female-female recordings, 22/41 residents in male-male-recordings) were  
391 previously given brief (~5 minute) social experiences with novel female conspecifics prior to  
392 postnatal day 40 as part of another study. Visitors were marked with acrylic paint or hair dye to  
393 facilitate identification in videos. We made measurements of vocal and non-vocal behaviors in  
394 three contexts: female residents with female visitors, male residents with male visitors, and male  
395 residents with female visitors.

396 **Behavior analysis:** Trained observers scored the following categories of behavior from  
397 webcam videos: (1) resident and visitor not interacting, (2) resident-initiated social interaction  
398 (sniffing, following, or chasing), (3) visitor-initiated social interaction, (4) resident mounting the  
399 visitor, (5) visitor mounting the resident, (6) resident-initiated fighting, (7) visitor-initiated fighting,  
400 and (8) mutual social interaction (mutual sniffing).

401 **USV recording and analysis.** USVs were recorded using an ultrasonic microphone (Avisoft,  
402 CMPA/CM16), connected to an Avisoft recording system (UltrasoundGate 166H, 250 kHz  
403 sample rate). In pilot experiments, USVs were detected using codes modified from those  
404 provided by the Holy lab (<http://holylab.wustl.edu/>) using the following parameters (mean  
405 frequency > 45 kHz; spectral purity > 0.3; spectral discontinuity < 0.85; min. USV duration = 5  
406 ms; minimum inter-syllable interval = 30 ms). We found, however, that some USVs were low  
407 amplitude and not detected accurately by our automated codes, particularly USVs emitted  
408 during male-male interactions. To ensure the highest accuracy of USV detection, trained  
409 observers manually annotated USVs from wav files using custom Matlab codes.

410 **Quantification and statistical analyses:** Parametric, two-sided statistical comparisons were  
411 used in all analyses unless otherwise noted ( $\alpha=0.05$ ). Details of the statistical analyses  
412 used in this study are included in S1 Table. No statistical methods were used to predetermine  
413 sample sizes. Error bars represent standard deviation unless otherwise noted. Violin plots were  
414 created using code from Holger Hoffmann (2021, Matlab Central File Exchange,  
415 <https://www.mathworks.com/matlabcentral/fileexchange/45134-violin-plot>).

416 **Data availability:** All source data generated in this study will be deposited in a digital data  
417 repository, and this section will be modified prior to publication to include the persistent DOI for  
418 the dataset.

419

420 **Acknowledgements:** Thanks to Tatyana Matveeva and David Smith for reading draft versions  
421 of this manuscript. Thanks also to Frank Drake and other CARE staff for their excellent mouse  
422 husbandry. This work was supported by funding from the Cornell Center for Social Sciences.

423 **Author contributions:** X.Z., N.M.P., P.Z., and K.A.T. designed the experiments. X.Z., P.Z.,  
424 N.M.P., and K.A.T. conducted the experiments. X.Z., P.Z., N.M.P., S.C., S.R., Z.H., W.C., C.K.,  
425 J.Z., and K.A.T. analyzed data. K.A.T. wrote the manuscript and all authors approved the final  
426 manuscript.

## 427 **References**

- 428 1. Tomova L, Wang KL, Thompson T, Matthews GA, Takahashi A, Tye KM, et al. Acute social  
429 isolation evokes midbrain craving responses similar to hunger. *Nat Neurosci.* 2020;23(12):1597-605.  
430
- 431 2. Baumeister RF, Leary MR. The need to belong: desire for interpersonal attachments as a  
432 fundamental human motivation. *Psychol Bull.* 1995;117(3):497-529.  
433
- 434 3. Maner JK, DeWall CN, Baumeister RF, Schaller M. Does social exclusion motivate interpersonal  
435 reconnection? Resolving the "porcupine problem". *J Pers Soc Psychol.* 2007;92(1):42-55.  
436
- 437 4. Zelikowsky M, Hui M, Karigo T, Choe A, Yang B, Blanco MR, et al. The neuropeptide Tac2 controls  
438 a distributed brain state induced by chronic social isolation stress. *Cell.* 2018;173(5):1265-79 e19.  
439
- 440 5. Barrot M, Wallace DL, Bolanos CA, Graham DL, Perrotti LI, Neve RL, et al. Regulation of anxiety  
441 and initiation of sexual behavior by CREB in the nucleus accumbens. *Proc Natl Acad Sci U S A.*  
442 2005;102(23):8357-62.  
443
- 444 6. Wallace DL, Han MH, Graham DL, Green TA, Vialou V, Iniguez SD, et al. CREB regulation of  
445 nucleus accumbens excitability mediates social isolation-induced behavioral deficits. *Nat Neurosci.*  
446 2009;12(2):200-9.  
447
- 448 7. Matsumoto K, Pinna G, Puia G, Guidotti A, Costa E. Social isolation stress-induced aggression in  
449 mice: a model to study the pharmacology of neurosteroidogenesis. *Stress.* 2005;8(2):85-93.  
450
- 451 8. Sciolino NR, Bortolato M, Eisenstein SA, Fu J, Oveisi F, Hohmann AG, et al. Social isolation and  
452 chronic handling alter endocannabinoid signaling and behavioral reactivity to context in adult rats.  
453 *Neuroscience.* 2010;168(2):371-86.  
454
- 455 9. Ma XC, Jiang D, Jiang WH, Wang F, Jia M, Wu J, et al. Social isolation-induced aggression  
456 potentiates anxiety and depressive-like behavior in male mice subjected to unpredictable chronic mild  
457 stress. *PLoS One.* 2011;6(6):e20955.  
458
- 459 10. Wiberg GS, Grice HC. Long-term isolation stress in rats. *Science.* 1963;142(3591):507.  
460
- 461 11. Valzelli L. The "isolation syndrome" in mice. *Psychopharmacologia.* 1973;31(4):305-20.  
462
- 463 12. Weiss IC, Pryce CR, Jongen-Relo AL, Nanz-Bahr NI, Feldon J. Effect of social isolation on stress-  
464 related behavioural and neuroendocrine state in the rat. *Behav Brain Res.* 2004;152(2):279-95.  
465
- 466 13. An D, Chen W, Yu DQ, Wang SW, Yu WZ, Xu H, et al. Effects of social isolation, re-socialization  
467 and age on cognitive and aggressive behaviors of Kunming mice and BALB/c mice. *Anim Sci J.*  
468 2017;88(5):798-806.  
469
- 470 14. Toth M, Mikics E, Tulogdi A, Aliczki M, Haller J. Post-weaning social isolation induces abnormal  
471 forms of aggression in conjunction with increased glucocorticoid and autonomic stress responses. *Horm*  
472 *Behav.* 2011;60(1):28-36.

- 473  
474 15. Chabout J, Serreau P, Ey E, Bellier L, Aubin T, Bourgeron T, et al. Adult male mice emit context-  
475 specific ultrasonic vocalizations that are modulated by prior isolation or group rearing environment.  
476 PLoS One. 2012;7(1):e29401.  
477
- 478 16. Inagaki H, Kuwahara M, Tsubone H, Mori Y. The effect of post-weaning individual housing on 50-  
479 kHz calls emitted from male rats to sexually receptive female rats. *Physiol Behav.* 2013;110-111:30-3.  
480
- 481 17. Keesom SM, Finton CJ, Sell GL, Hurley LM. Early-life social isolation influences mouse ultrasonic  
482 vocalizations during male-male social encounters. *PLoS One.* 2017;12(1):e0169705.  
483
- 484 18. Seffer D, Rippberger H, Schwarting RK, Wohr M. Pro-social 50-kHz ultrasonic communication in  
485 rats: post-weaning but not post-adolescent social isolation leads to social impairments-phenotypic  
486 rescue by re-socialization. *Front Behav Neurosci.* 2015;9:102.  
487
- 488 19. Screven LA, Dent ML. Social isolation produces no effect on ultrasonic vocalization production in  
489 adult female CBA/CaJ mice. *PLoS One.* 2019;14(3):e0213068.  
490
- 491 20. Portfors CV, Perkel DJ. The role of ultrasonic vocalizations in mouse communication. *Curr Opin*  
492 *Neurobiol.* 2014;28:115-20.  
493
- 494 21. Sales G, Pye D. Ultrasonic communication by animals. London, New York,: Chapman and Hall;  
495 Wiley; 1974.
- 496 22. Matthews GA, Nieh EH, Vander Weele CM, Halbert SA, Pradhan RV, Yosafat AS, et al. Dorsal  
497 raphe dopamine neurons represent the experience of social isolation. *Cell.* 2016;164(4):617-31.
- 498 23. Niesink RJ, van Ree JM. Short-term isolation increases social interactions of male rats: a  
499 parametric analysis. *Physiol Behav.* 1982;29(5):819-25.  
500
- 501 24. Panksepp J, Beatty WW. Social deprivation and play in rats. *Behav Neural Biol.* 1980;30(2):197-  
502 206.  
503
- 504 25. Matthews GA, Tye KM. Neural mechanisms of social homeostasis. *Ann N Y Acad Sci.*  
505 2019;1457(1):5-25.  
506
- 507 26. Sangiamo DT, Warren MR, Neunuebel JP. Ultrasonic signals associated with different types of  
508 social behavior of mice. *Nat Neurosci.* 2020;23(3):411-22.  
509
- 510 27. Warren MR, Clein RS, Spurrier MS, Roth ED, Neunuebel JP. Ultrashort-range, high-frequency  
511 communication by female mice shapes social interactions. *Sci Rep.* 2020;10(1):2637.  
512
- 513 28. Neunuebel JP, Taylor AL, Arthur BJ, Egnor SE. Female mice ultrasonically interact with males  
514 during courtship displays. *Elife.* 2015;4.  
515
- 516 29. Warren MR, Spurrier MS, Roth ED, Neunuebel JP. Sex differences in vocal communication of  
517 freely interacting adult mice depend upon behavioral context. *PLoS One.* 2018;13(9):e0204527.  
518

- 519 30. Karigo T, Kennedy A, Yang B, Liu M, Tai D, Wahle IA, et al. Distinct hypothalamic control of same-  
520 and opposite-sex mounting behaviour in mice. *Nature*. 2021;589(7841):258-63.  
521
- 522 31. Fang J, Clemens LG. Contextual determinants of female-female mounting in laboratory rats.  
523 *Anim Behav*. 1999;57(3):545-55.  
524
- 525 32. Williamson CM, Lee W, Curley JP. Temporal dynamics of social hierarchy formation and  
526 maintenance in male mice. *Anim Behav*. 2016;115:259-72.  
527
- 528 33. Williamson CM, Lee W, DeCasien AR, Lanham A, Romeo RD, Curley JP. Social hierarchy position  
529 in female mice is associated with plasma corticosterone levels and hypothalamic gene expression. *Sci*  
530 *Rep*. 2019;9(1):7324.  
531
- 532 34. Hanson JL, Hurley LM. Female presence and estrous state influence mouse ultrasonic courtship  
533 vocalizations. *PLoS One*. 2012;7(7):e40782.  
534
- 535 35. Matsumoto YK, Okanoya K. Phase-specific vocalizations of male mice at the initial encounter  
536 during the courtship sequence. *PLoS One*. 2016;11(2):e0147102.  
537
- 538 36. Bronson FH. The reproductive ecology of the house mouse. *Q Rev Biol*. 1979;54(3):265-99.  
539
- 540 37. Lidicker WZ. Social behaviour and density regulation in house mice living in large enclosures. *J*  
541 *Anim Ecol*. 1976;45:677-97.  
542
- 543 38. Manning CJ, Dewsbury DA, Wakeland EK, Potts WK. Communal nesting and communal nursing in  
544 house mice, *Mus musculus domesticus*. *Anim Behav*. 1995;50(3):741-51.  
545
- 546 39. Gunaydin LA, Grosenick L, Finkelstein JC, Kauvar IV, Fenno LE, Adhikari A, et al. Natural neural  
547 projection dynamics underlying social behavior. *Cell*. 2014;157(7):1535-51.  
548
- 549 40. Wang F, Kessels HW, Hu H. The mouse that roared: neural mechanisms of social hierarchy.  
550 *Trends Neurosci*. 2014;37(11):674-82.  
551
- 552 41. Wei YC, Wang SR, Jiao ZL, Zhang W, Lin JK, Li XY, et al. Medial preoptic area in mice is capable of  
553 mediating sexually dimorphic behaviors regardless of gender. *Nat Commun*. 2018;9(1):279.  
554
- 555 42. Hart BL, Haugen CM, Peterson DM. Effects of medial preoptic-anterior hypothalamic lesions of  
556 mating behavior of male cats. *Brain Res*. 1973;54:177-91.  
557
- 558 43. Larsson K, Heimer L. Mating behaviour of male rats after lesions in the preoptic area. *Nature*.  
559 1964;202:413-4.  
560
- 561 44. Hansen S, Kohler C, Goldstein M, Steinbusch HV. Effects of ibotenic acid-induced neuronal  
562 degeneration in the medial preoptic area and the lateral hypothalamic area on sexual behavior in the  
563 male rat. *Brain Res*. 1982;239(1):213-32.  
564
- 565 45. Senst L, Baimoukhametova D, Sterley TL, Bains JS. Sexually dimorphic neuronal responses to  
566 social isolation. *Elife*. 2016;5.

- 567  
568 46. Grippo AJ, Gerena D, Huang J, Kumar N, Shah M, Ughreja R, et al. Social isolation induces  
569 behavioral and neuroendocrine disturbances relevant to depression in female and male prairie voles.  
570 Psychoneuroendocrinology. 2007;32(8-10):966-80.  
571  
572 47. Albert DJ, Petrovic DM, Walsh ML. Ovariectomy attenuates aggression by female rats cohabiting  
573 with sexually active sterile males. *Physiol Behav.* 1989;45(2):225-8.  
574  
575 48. Tschida K, Michael V, Takatoh J, Han BX, Zhao S, Sakurai K, et al. A specialized neural circuit  
576 gates social vocalizations in the mouse. *Neuron.* 2019;103(3):459-72 e4.  
577  
578 49. Michael V, Goffinet, J., Pearson, J., Wang, F., Tschida, K., and Mooney, R. Circuit and synaptic  
579 organization of forebrain-to-midbrain pathways that promote and suppress vocalization. *Elife.* 2020;9.  
580  
581 50. Gao SC, Wei YC, Wang SR, Xu XH. Medial preoptic area modulates courtship ultrasonic  
582 vocalization in adult male mice. *Neurosci Bull.* 2019;35(4):697-708.  
583  
584 51. Lister RG, Hilakivi LA. The effects of novelty, isolation, light and ethanol on the social behavior of  
585 mice. *Psychopharmacology (Berl).* 1988;96(2):181-7.  
586  
587 52. O'Donnell V, Blanchard RJ, Blanchard DC. Mouse aggression increases after 24 hours of isolation  
588 or housing with females. *Behav Neural Biol.* 1981;32(1):89-103.  
589  
590 53. Crowcroft P. *Mice all over.* London,: Foulis; 1966.  
591  
592 54. Yang T, Yang CF, Chizari MD, Maheswaranathan N, Burke KJ, Jr., Borius M, et al. Social control of  
593 hypothalamus-mediated male aggression. *Neuron.* 2017;95(4):955-70 e4.  
594  
595 55. Miczek KA, Maxson SC, Fish EW, Faccidomo S. Aggressive behavioral phenotypes in mice. *Behav*  
596 *Brain Res.* 2001;125(1-2):167-81.  
597  
598 56. Gourbal BE, Barthelemy M, Petit G, Gabrion C. Spectrographic analysis of the ultrasonic  
599 vocalisations of adult male and female BALB/c mice. *Naturwissenschaften.* 2004;91(8):381-5.

600 **Figure Legends**

601 **Fig 1. Effects of acute isolation on USV production during same-sex and opposite-sex**  
602 **social encounters.** (A) Number of USVs recorded is shown for female-female social  
603 encounters, in which a group-housed female visitor was introduced into the home cage of either  
604 a group-housed or a single-housed resident. Left panel shows total number of USVs produced  
605 during social encounters with group-housed and single-housed female residents. Middle panels  
606 (trials with group-housed residents) and right panel (trials with single-housed residents) show  
607 the dynamics of USV production over time, plotted as total number of USVs produced in each  
608 10s-long bin. Black line shows mean values for each condition, and thinner colored lines show 5  
609 representative trials. (B) Same as (A), for male-male social encounters. (C) Same as (A), for  
610 male-female social encounters. Please note the difference in y axis ranges for the left-most  
611 plots in (A)-(C).

612 **Fig 2. Effects of acute isolation on non-vocal social behaviors.** (A) Proportion time spent  
613 engaged in social interaction is shown for female-female trials (left), male-male trials (middle),  
614 and male-female trials (right). (B) Violin plots show the proportion time spent engaged in  
615 different non-vocal social behaviors for female-female trials (left), male-male trials (middle), and  
616 male-female trials (right). Gray, trials with group-housed residents; red, trials with single-housed  
617 residents. White lines indicate median values, black lines indicate mean values. Asterisks,  $p <$   
618 0.05. (C) Pie charts show the number of trials with mounting in female-female trials (left), male-  
619 male trials (middle), and male-female trials (right). White, no mounting; red, resident-initiated  
620 mounting; blue, visitor-initiated mounting; green, trials with both resident- and visitor-initiated  
621 mounting.

622 **Fig 3. Effects of acute isolation on the relationship of USV production to non-vocal social**  
623 **behaviors.** (A) Scatterplots show the number of USVs emitted versus the proportion total time  
624 spent interacting for female-female trials (left), male-male trials (middle), and male-female trials



625 (right). Black symbols, trials with group-housed residents; red symbols, trials with single-housed  
626 residents. (B) Violin plots show the proportion of USVs produced during different types of  
627 behavior. Gray plots summarize data for trials with group-housed residents, red plots  
628 summarize data for trials with single-housed residents. White lines indicate median values,  
629 black lines indicate mean values. Asterisks,  $p < 0.05$ . (C) Spectrograms show USVs produced  
630 during mounting events during female-female (left), male-male (middle), and male-female (right)  
631 social interactions. Pie charts show the number of trials in which mounting was accompanied by  
632 USV production (gray) versus trials in which mounting was not accompanied by USV production  
633 (white) during female-female (left), male-male (middle), and male-female (right) social  
634 interactions.

635

## 636 **Supporting Information**

637 **S1 Fig. Effects of acute isolation on latency to first USV in same-sex and opposite-sex**  
638 **interactions.** Latency to the first recorded USV is shown for female-female social encounters  
639 (A), male-male encounters (B), and male-female encounters (C). Trials with 0 USVs are  
640 excluded.

641 **S2 Fig. Female-female ethograms, group-housed residents.** Ethograms are shown for each  
642 female-female trial with a group-housed resident. The top half of each plot shows USV rate over  
643 time (total USVs in each 10s-long bin), and the bottom half of each plot shows the occurrence of  
644 difference non-vocal social behaviors over time. Red, resident-initiated interaction; magenta,  
645 resident-initiated mounting; orange, resident-initiated fighting; blue, visitor-initiated interaction;  
646 cyan, visitor-initiated mounting; black, visitor-initiated fighting; green, mutual interaction; white,  
647 not interacting.

648 **S3 Fig. Female-female ethograms, single-housed residents.** Ethograms are shown for each  
649 female-female trial with a single-housed resident. The top half of each plot shows USV rate over  
650 time (total USVs in each 10s-long bin), and the bottom half of each plot shows the occurrence of  
651 difference non-vocal social behaviors over time. Red, resident-initiated interaction; magenta,  
652 resident-initiated mounting; orange, resident-initiated fighting; blue, visitor-initiated interaction;  
653 cyan, visitor-initiated mounting; black, visitor-initiated fighting; green, mutual interaction; white,  
654 not interacting.

655 **S4 Fig. Male-male ethograms, group-housed residents.** Ethograms are shown for each  
656 male-male trial with a group-housed resident. The top half of each plot shows USV rate over  
657 time (total USVs in each 10s-long bin), and the bottom half of each plot shows the occurrence of  
658 difference non-vocal social behaviors over time. Red, resident-initiated interaction; magenta,  
659 resident-initiated mounting; orange, resident-initiated fighting; blue, visitor-initiated interaction;  
660 cyan, visitor-initiated mounting; black, visitor-initiated fighting; green, mutual interaction; white,  
661 not interacting.

662 **S5 Fig. Male-male ethograms, single-housed residents.** Ethograms are shown for each  
663 male-male trial with a single-housed resident. The top half of each plot shows USV rate over  
664 time (total USVs in each 10s-long bin), and the bottom half of each plot shows the occurrence of  
665 difference non-vocal social behaviors over time. Red, resident-initiated interaction; magenta,  
666 resident-initiated mounting; orange, resident-initiated fighting; blue, visitor-initiated interaction;  
667 cyan, visitor-initiated mounting; black, visitor-initiated fighting; green, mutual interaction; white,  
668 not interacting.

669 **S6 Fig. Male-female ethograms, group-housed residents.** Ethograms are shown for each  
670 male-female trial with a group-housed resident. The top half of each plot shows USV rate over  
671 time (total USVs in each 10s-long bin), and the bottom half of each plot shows the occurrence of  
672 difference non-vocal social behaviors over time. Red, resident-initiated interaction; magenta,

673 resident-initiated mounting; orange, resident-initiated fighting; blue, visitor-initiated interaction;  
674 cyan, visitor-initiated mounting; black, visitor-initiated fighting; green, mutual interaction; white,  
675 not interacting.

676 **S7 Fig. Male-female ethograms, single-housed residents.** Ethograms are shown for each  
677 male-female trial with a single-housed resident. The top half of each plot shows USV rate over  
678 time (total USVs in each 10s-long bin), and the bottom half of each plot shows the occurrence of  
679 difference non-vocal social behaviors over time. Red, resident-initiated interaction; magenta,  
680 resident-initiated mounting; orange, resident-initiated fighting; blue, visitor-initiated interaction;  
681 cyan, visitor-initiated mounting; black, visitor-initiated fighting; green, mutual interaction; white,  
682 not interacting.

683 **S1 Table. Statistics Summary**

# Fig 1. Effects of acute isolation on USV production during same-sex and opposite-sex social encounters

## A Female-female interactions

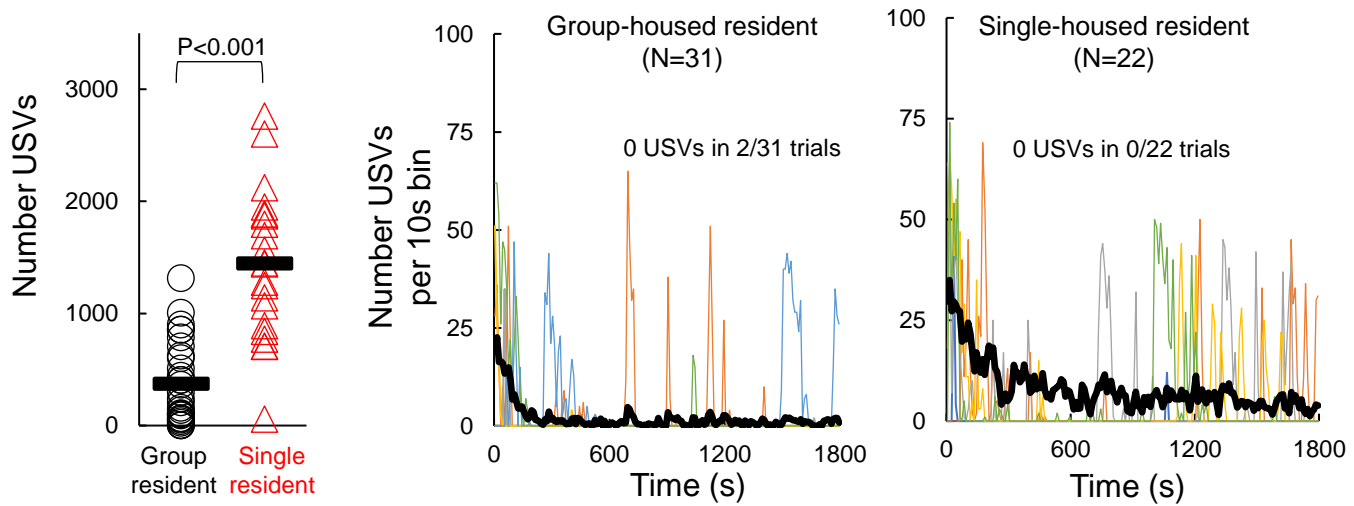

## B Male-male interactions

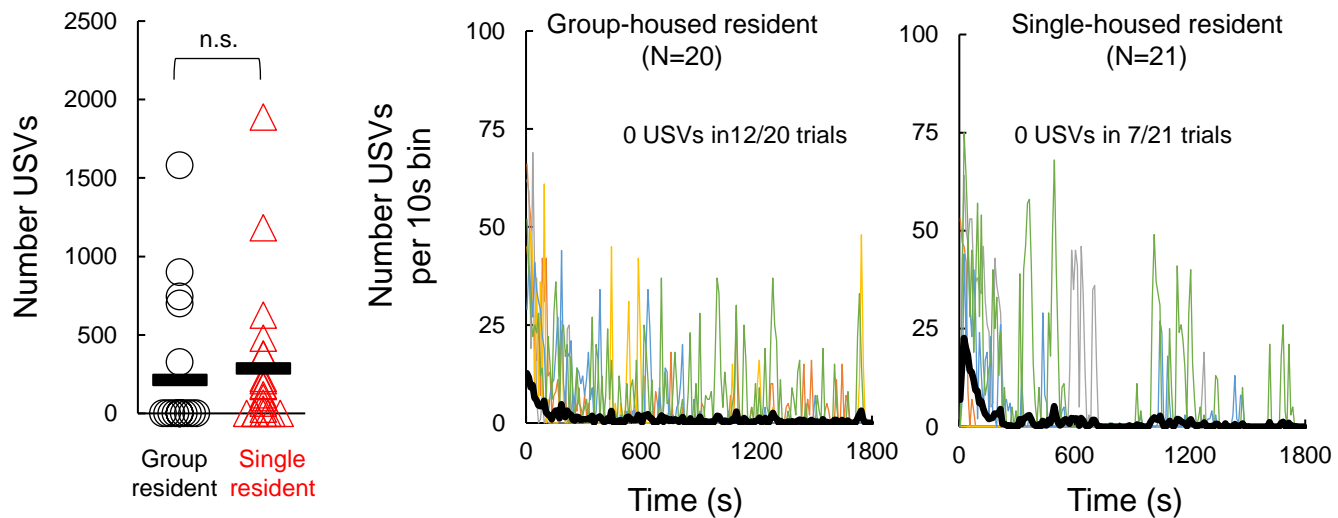

## C Male-female interactions

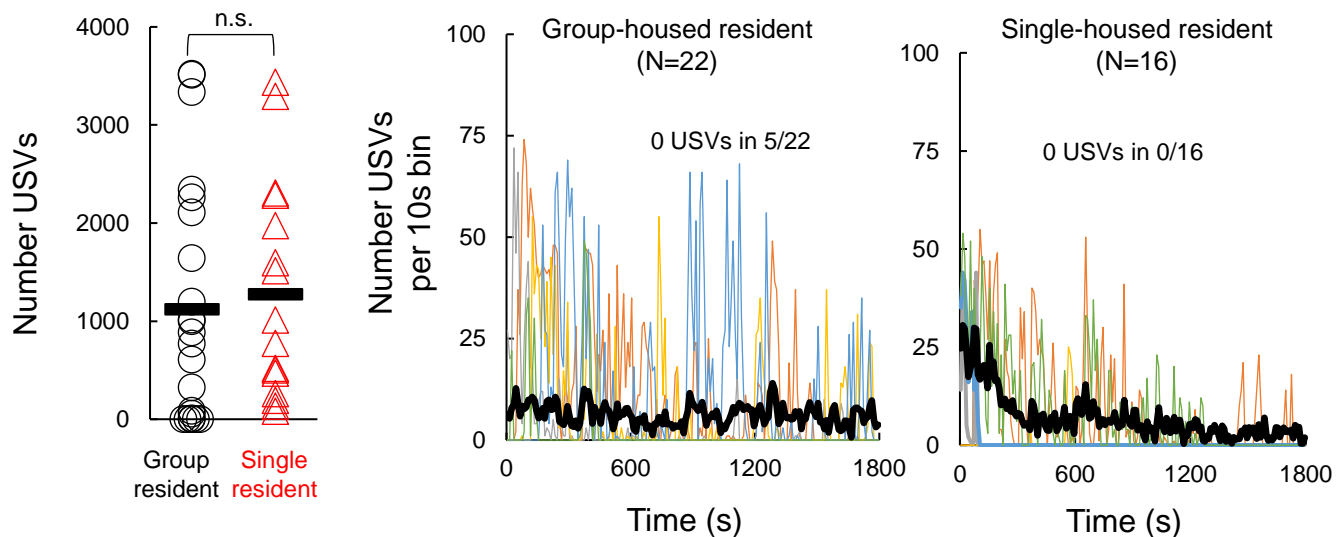

**Fig 1. Effects of acute isolation on USV production during same-sex and opposite-sex social encounters.** (A) Number of USVs recorded is shown for female-female social encounters, in which a group-housed female visitor was introduced into the home cage of either a group-housed or a single-housed resident. Left panel shows total number of USVs produced during social encounters with group-housed and single-housed female residents. Middle panel (trials with group-housed residents) and right panel (trials with single-housed residents) show the dynamics of USV production over time, plotted as total number of USVs produced in each 10s-long bin. Black line shows mean values for each condition, and thinner colored lines show 5 representative trials. (B) Same as (A), for male-male social encounters. (C) Same as (A), for male-female social encounters. Please note the difference in y axis ranges for the left-most plots in (A)-(C).

## Fig 2. Effects of acute isolation on non-vocal social behaviors

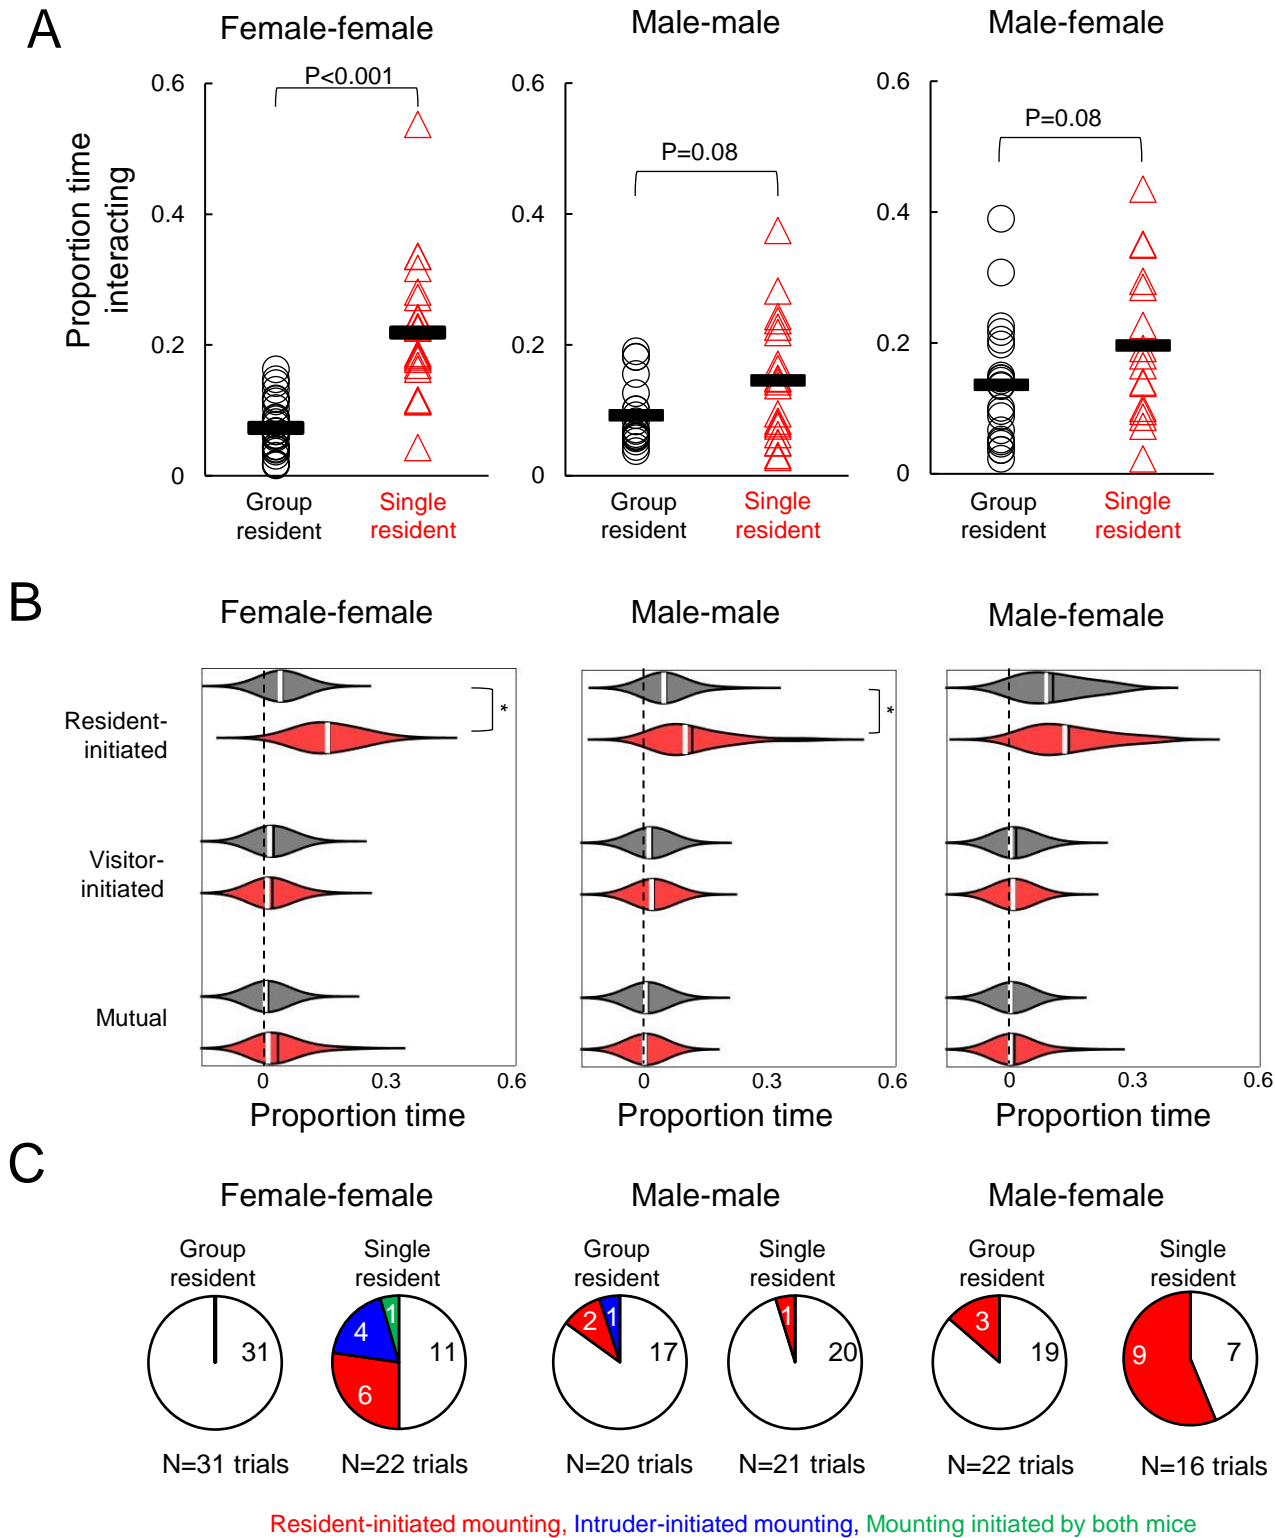

**Fig 2. Effects of acute isolation on non-vocal social behaviors.** (A) Proportion time spent engaged in social interaction is shown for female-female trials (left), male-male trials (middle), and male-female trials (right). (B) Violin plots show the proportion time spent engaged in different non-vocal social behaviors for female-female trials (left), male-male trials (middle), and male-female trials (right). Gray, trials with group-housed residents; red, trials with single-housed residents. White lines indicate median values, black lines indicate mean values. Asterisks,  $p < 0.05$ . (C) Pie charts show the number of trials with mounting in female-female trials (left), male-male trials (middle), and male-female trials (right). White, no mounting; red, resident-initiated mounting; blue, visitor-initiated mounting; green, trials with both resident- and visitor-initiated mounting.

## Fig 3. Effects of acute isolation on the relationship of USV production to non-vocal social behaviors

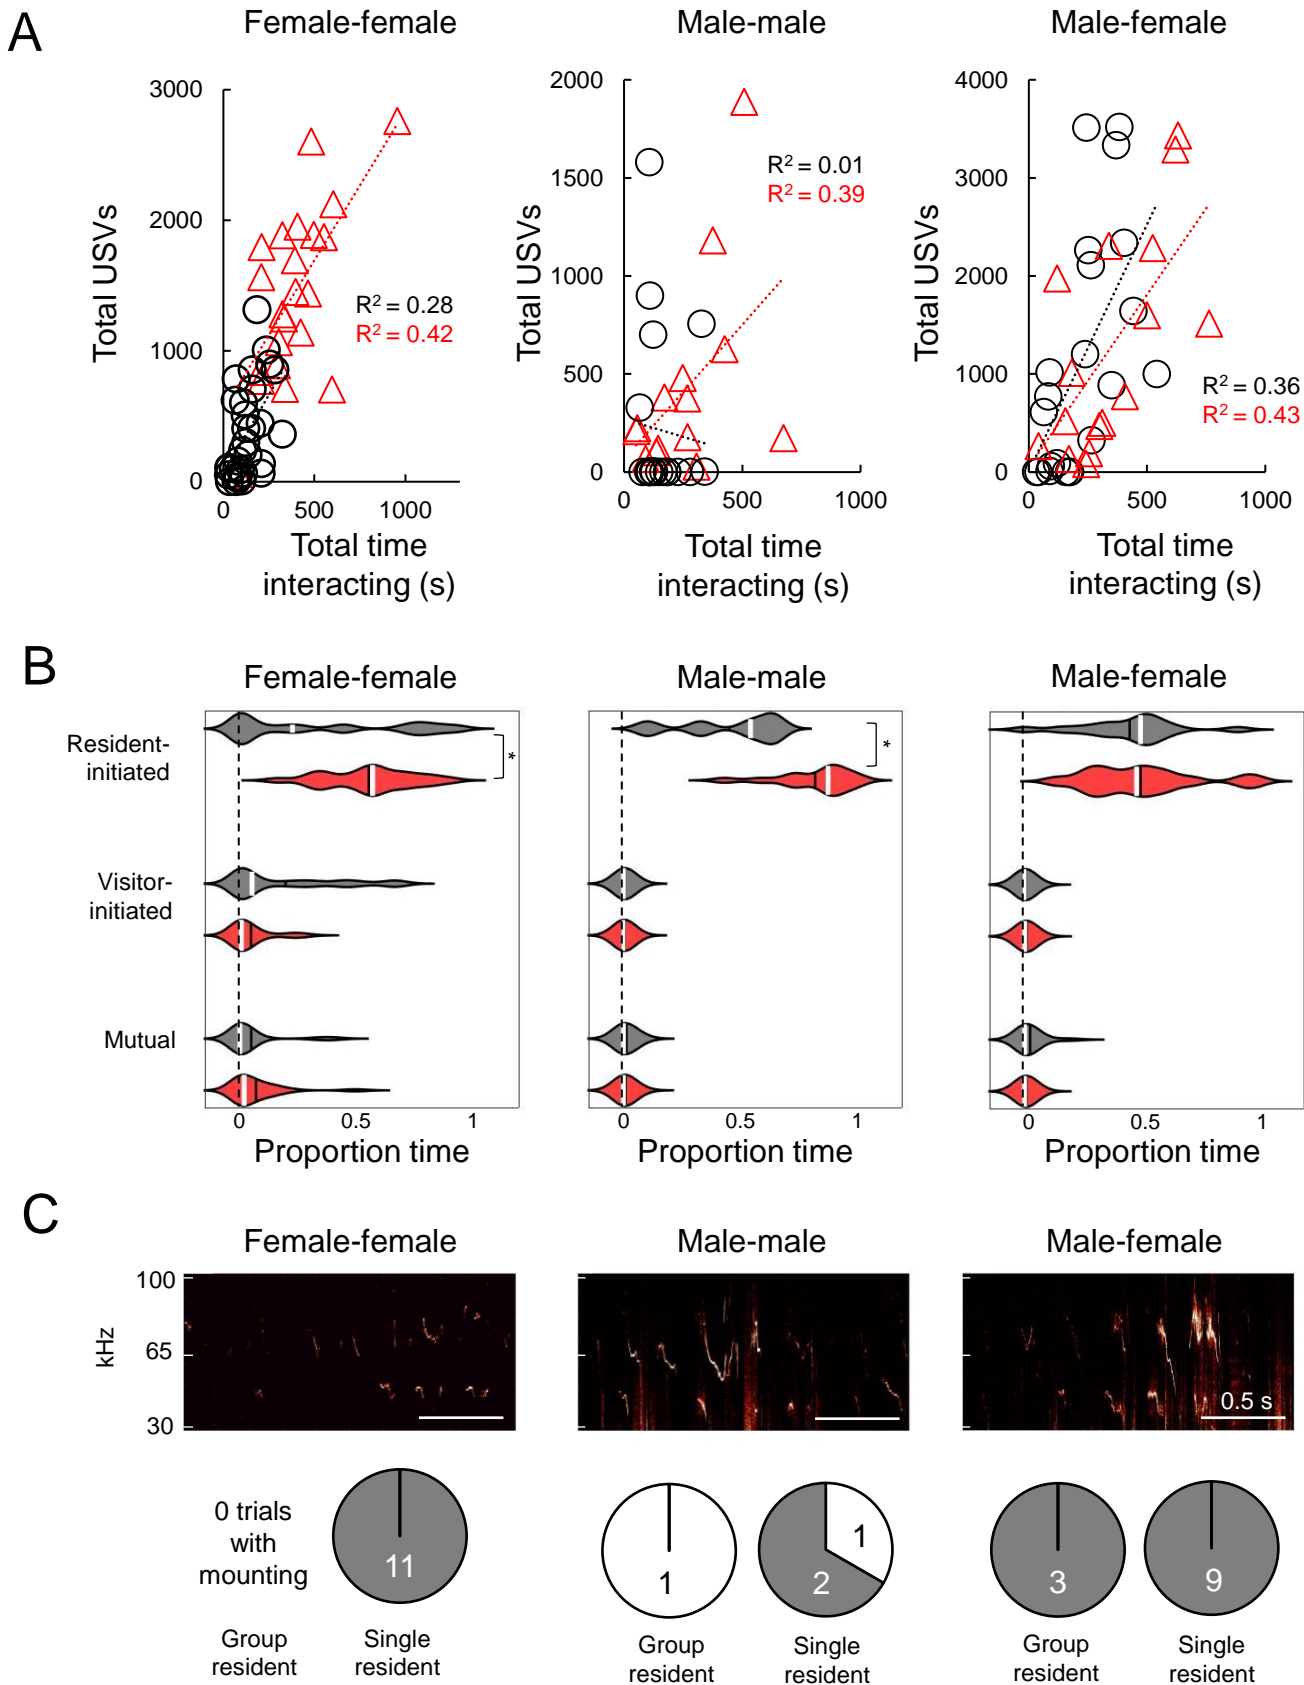



**Fig 3. Effects of acute isolation on the relationship of USV production to non-vocal social behaviors.** (A) Scatterplots show the number of USVs emitted versus the proportion total time spent interacting for female-female trials (left), male-male trials (middle), and male-female trials (right). Black symbols, trials with group-housed residents; red symbols, trials with single-housed residents. (B) Violin plots show the proportion of USVs produced during different types of behavior. Gray plots summarize data for trials with group-housed residents, red plots summarize data for trials with single-housed residents. White lines indicate median values, black lines indicate mean values. Asterisks,  $p < 0.05$ . (C) Spectrograms show USVs produced during mounting events during female-female (left), male-male (middle), and male-female (right) social interactions. Pie charts show the number of trials in which mounting was accompanied by USV production (gray) versus trials in which mounting was not accompanied by USV production (white) during female-female (left), male-male (middle), and male-female (right) social interactions.
